# Supplementary material
Source: PubMed Central journal article supplement (PMC2040890)

**A**

|   |   |   |          |
|---|---|---|----------|
| + | + | + | HA-Ub    |
| - | + | + | N4BP1-V5 |
| - | - | + | Myc-Itch |

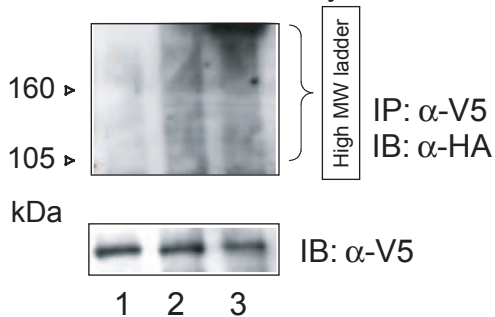**B**

|   |   |   |   |                       |
|---|---|---|---|-----------------------|
| - | + | + | + | E1/E2                 |
| + | + | + | + | Ubiquitin             |
| + | + | + | + | N4BP1-V5              |
| - | - | - | + | GST- $\Delta$ C2-Itch |

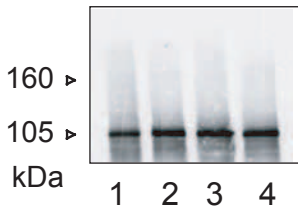

Supplement: pnas_0701773104_1.pdf [file pnas_0701773104_1.pdf]

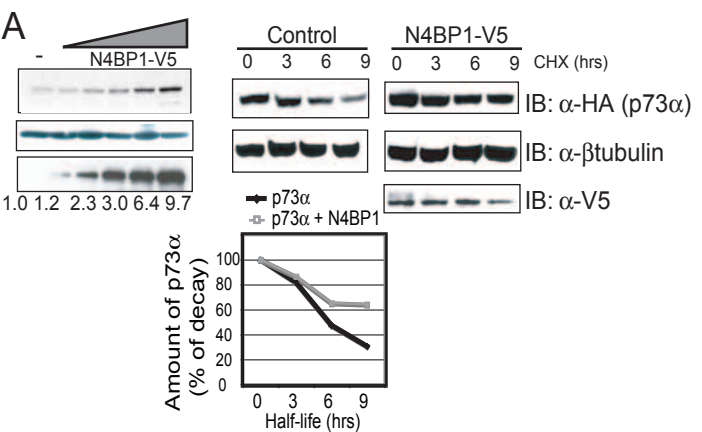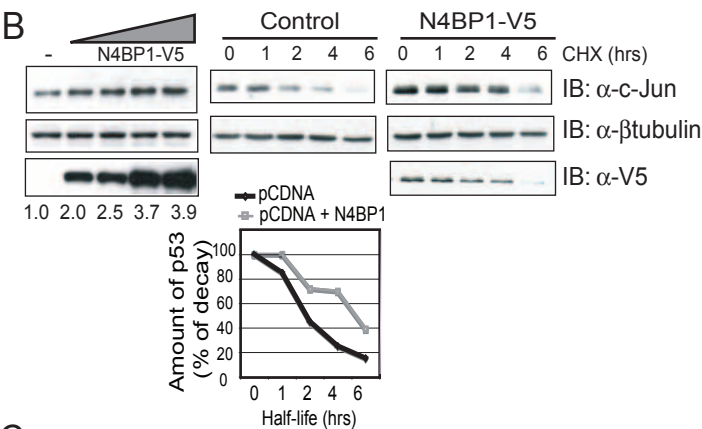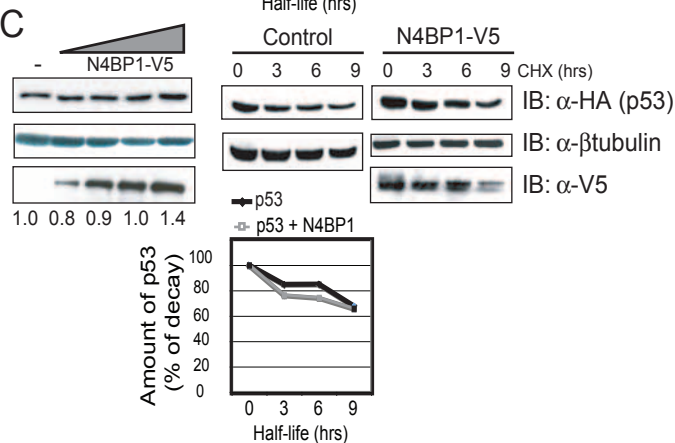

Supplement: pnas_0701773104_3.pdf [file pnas_0701773104_3.pdf]

Control

N4BP1-V5

0 3 6 9

0 3 6 9

CHX (hrs)

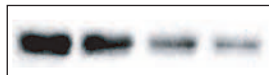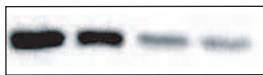IB:  $\alpha$ -HA (p73 $\gamma$ )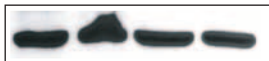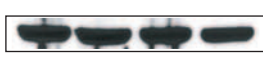IB:  $\alpha$ - $\beta$ tubulin◆ p73 $\gamma$ ■ p73 $\gamma$  + N4BP1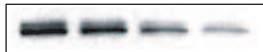IB:  $\alpha$ -V5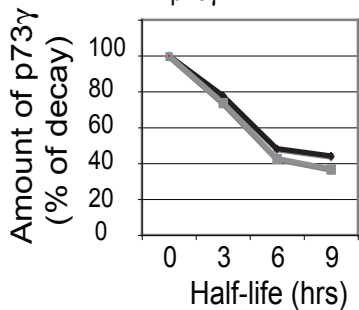

Supplement: pnas_0701773104_4.pdf [file pnas_0701773104_4.pdf]

**A**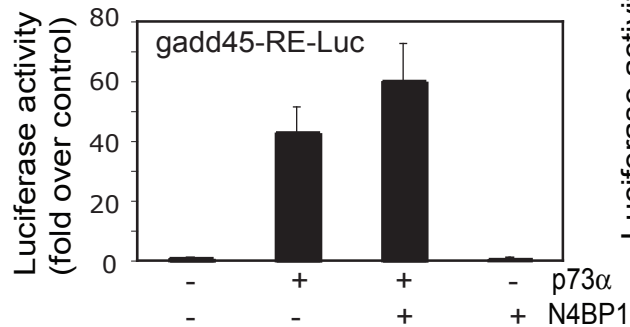**B**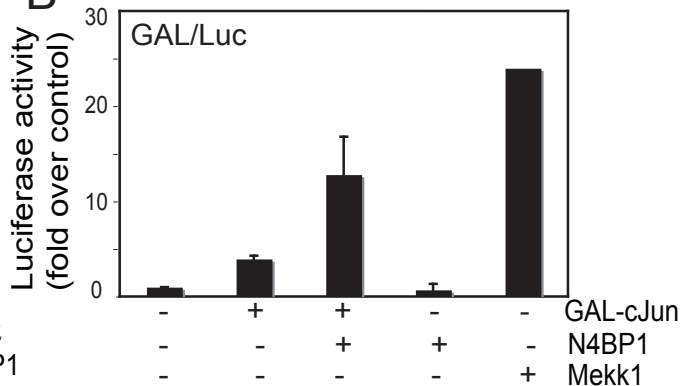**C**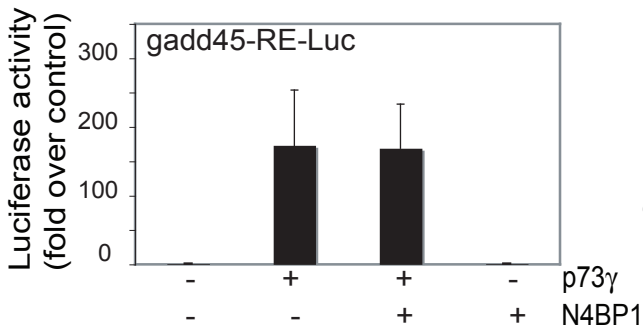**D**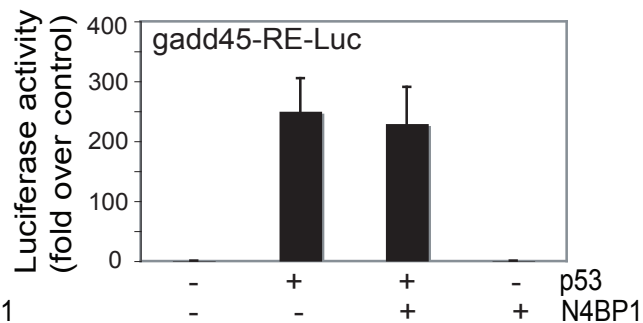

Supplement: pnas_0701773104_5.pdf [file pnas_0701773104_5.pdf]
